# Supplementary material for: Local impacts of climate change on winter wheat in Great Britain
Source: PubMed Central journal article supplement (PMC8206732; doi:10.1098/rsos.201669), 2021-06-16
Supplement: rsos201669_review_history.pdf [file rsos201669_review_history.pdf]

## **Local impacts of climate change on winter wheat in Great Britain**

Thibaut Putelat, Andrew P. Whitmore, Nimai Senapati and Mikhail A. Semenov

### **Article citation details**

*R. Soc. open sci.* **8**: 201669.

<http://dx.doi.org/10.1098/rsos.201669>

### **Review timeline**

Original submission: 17 September 2020

Revised submission: 23 February 2021

Final acceptance: 17 May 2021

Note: Reports are unedited and appear as submitted by the referee. The review history appears in chronological order.

Note: This manuscript was transferred from another Royal Society journal with peer review.

## Review History

### RSOS-201669.R0 (Original submission)

#### Review form: Reviewer 1

**Is the manuscript scientifically sound in its present form?**

Yes

**Are the interpretations and conclusions justified by the results?**

Yes

**Is the language acceptable?**

Yes

**Do you have any ethical concerns with this paper?**

No

**Have you any concerns about statistical analyses in this paper?**

No

**Recommendation?**

Accept as is

**Comments to the Author(s)**

I have reviewed a R1 manuscript. The authors replied to the feedback of the reviewers and I have no additional questions.

**Review form: Reviewer 2****Is the manuscript scientifically sound in its present form?**

No

**Are the interpretations and conclusions justified by the results?**

No

**Is the language acceptable?**

Yes

**Do you have any ethical concerns with this paper?**

No

**Have you any concerns about statistical analyses in this paper?**

No

**Recommendation?**

Major revision is needed (please make suggestions in comments)

**Comments to the Author(s)**

The responses of the authors to major critics of the previous three referees are not sufficient. I think an appropriate response to the reviewers requests needs another major revision. Title, abstract, research question raised and methods chosen should follow a recognizable logic. This is currently not the case and requests a major overhaul of the study and the manuscript.

**Response to Ref #1**

The handling of drought stress in the manuscript is still confusing. The authors should simply adjust terms. They consider a mean season drought stress and a drought stress around anthesis. Just use one abbreviation with two indices and don't confuse the reader by the hopeless attempt to introduce a new terminology.

**Response to Ref #2**

The authors still suggest in their modified title they would address the future winter wheat cropping in Great Britain. The authors downplay the meaning of the title for the reviewer but not for the reader. The reader still expects a comprehensive regional study.

The focus of the paper is unclear: 'This paper will primarily focus on estimating the level of this climate uncertainty and weather variability on crop yield in the future'.

What is meant with, "estimating the level of this climate uncertainty"? I cannot find the answer in the abstract of the paper or elsewhere.

The study has value only for the test sites where real soil conditions were used as basis. At all other location the reader is still left with the question, how will the outcome be sustained when the actual soil instead of the generalised one is taken into account?

For a source of variability study with a representative simulation of the soil x climate interactions for Great Britain the authors might use the following analysis as an orientation (reviewer not among the authors):

Hattermann, F. F., Vetter, T., Breuer, L., Su, B., Daggupati, P., Donnelly, C., Fekete, B., Flörke, F., Gosling, S. N., Hoffmann, P., Liersch, S., Masaki, Y., Motovilov, Y., Müller, C., Samaniego, L., Stacke, T., Wada, Y., Yang, T., Krysanova, V. (2018): Sources of uncertainty in hydrological climate impact assessment: a cross-scale study. - *Environmental Research Letters*, 13, 1, 015006. <https://doi.org/10.1088/1748-9326/aa9938>

Response to Ref 3

Ref 3 has the same concern as Ref 2 in respect to the representative value of the study. I share these concerns and think the authors current reply is not sufficient in this respect.

Instead of keeping the soil profiles constant I would recommend to vary them as suggested by Ref 3 and apply an analysis of variance similar to the one above.

Reply to the Ref 3 Page 3 line 79 comment. The authors need to explain better their motivation for combining the GCM ensemble outcome with one weather generator. It would be interesting to see the different effects of an impact study that a) leaves the GCM stochastic more or less untreated and corrects for the mean bias only and b) that combines the GCM outcome with a weather generator.

## Decision letter (RSOS-201669.R0)

We hope you are keeping well at this difficult and unusual time. We continue to value your support of the journal in these challenging circumstances. If Royal Society Open Science can assist you at all, please don't hesitate to let us know at the email address below.

Dear Dr Putelat

On behalf of the Editors, we are pleased to inform you that your Manuscript RSOS-201669 "Impacts of climate change on winter wheat in Great Britain" has been accepted for publication in Royal Society Open Science subject to minor revision in accordance with the referees' reports. Please find the referees' comments along with any feedback from the Editors below my signature.

We invite you to respond to the comments and revise your manuscript. Below the referees' and Editors' comments (where applicable) we provide additional requirements. Final acceptance of your manuscript is dependent on these requirements being met. We provide guidance below to help you prepare your revision.

Please submit your revised manuscript and required files (see below) no later than 7 days from today's (ie 17-Feb-2021) date. Note: the ScholarOne system will 'lock' if submission of the revision is attempted 7 or more days after the deadline. If you do not think you will be able to meet this deadline please contact the editorial office immediately.

Please note article processing charges apply to papers accepted for publication in Royal Society Open Science (<https://royalsocietypublishing.org/rsos/charges>). Charges will also apply to papers transferred to the journal from other Royal Society Publishing journals, as well as papers submitted as part of our collaboration with the Royal Society of Chemistry (<https://royalsocietypublishing.org/rsos/chemistry>). Fee waivers are available but must be requested when you submit your revision (<https://royalsocietypublishing.org/rsos/waivers>).

Thank you for submitting your manuscript to Royal Society Open Science and we look forward to receiving your revision. If you have any questions at all, please do not hesitate to get in touch.

Best regards,  
Lianne Parkhouse

Editorial Coordinator  
Royal Society Open Science  
openscience@royalsociety.org

on behalf of Dr Yhasmin Mendes de Moura (Associate Editor) and Pete Smith (Subject Editor)  
openscience@royalsociety.org

Subject Editor comments to the authors:

The Associate Editor recommends acceptance and I am happy to follow this recommendation, but I note a number of critical comments from Reviewer 2, which I think it would be useful to address when submitting your final version. Most comments can be addressed through rewording and change of emphasis, which will preempt similar criticisms from the readers, so I urge you to consider them carefully.

Best wishes,  
Pete Smith

Associate Editor Comments to Author (Dr Yhasmin Mendes de Moura):

Dear author's,

I am delighted to recommend this manuscript for publication at Open Science Royal Society.

Congratulations!

Best regards,  
Reviewer comments to Author:

Reviewer: 1  
Comments to the Author(s)

I have reviewed a R1 manuscript. The authors replied to the feedback of the reviewers and I have no additional questions.

Reviewer: 2  
Comments to the Author(s)

The responses of the authors to major critics of the previous three referees are not sufficient. I think an appropriate response to the reviewers requests needs another major revision. Title, abstract, research question raised and methods chosen should follow a recognizable logic. This is currently not the case and requests a major overhaul of the study and the manuscript.

Response to Ref #1

The handling of drought stress in the manuscript is still confusing. The authors should simply adjust terms. They consider a mean season drought stress and a drought stress around anthesis. Just use one abbreviation with two indices and don't confuse the reader by the hopeless attempt to introduce a new terminology.

Response to Ref #2

The authors still suggest in their modified title they would address the future winter wheat cropping in Great Britain. The authors downplay the meaning of the title for the reviewer but not for the reader. The reader still expects a comprehensive regional study.

The focus of the paper is unclear: 'This paper will primarily focus on estimating the level of this climate uncertainty and weather variability on crop yield in the future'.

What is meant with, "estimating the level of this climate uncertainty"? I cannot find the answer in the abstract of the paper or elsewhere.

The study has value only for the test sites where real soil conditions were used as basis. At all other location the reader is still left with the question, how will the outcome be sustained when the actual soil instead of the generalised one is taken into account?

For a source of variability study with a representative simulation of the soil x climate interactions for Great Britain the authors might use the following analysis as an orientation (reviewer not among the authors):

Hattermann, F. F., Vetter, T., Breuer, L., Su, B., Daggupati, P., Donnelly, C., Fekete, B., Flörke, F., Gosling, S. N., Hoffmann, P., Liersch, S., Masaki, Y., Motovilov, Y., Müller, C., Samaniego, L., Stacke, T., Wada, Y., Yang, T., Krysanova, V. (2018): Sources of uncertainty in hydrological climate impact assessment: a cross-scale study. - *Environmental Research Letters*, 13, 1, 015006. <https://doi.org/10.1088/1748-9326/aa9938>

Response to Ref 3

Ref 3 has the same concern as Ref 2 in respect to the representative value of the study. I share these concerns and think the authors current reply is not sufficient in this respect.

Instead of keeping the soil profiles constant I would recommend to vary them as suggested by Ref 3 and apply an analysis of variance similar to the one above.

Reply to the Ref 3 Page 3 line 79 comment. The authors need to explain better their motivation for combining the GCM ensemble outcome with one weather generator. It would be interesting to see the different effects of an impact study that a) leaves the GCM stochastic more or less untreated and corrects for the mean bias only and b) that combines the GCM outcome with a weather generator.

===PREPARING YOUR MANUSCRIPT===

Your revised paper should include the changes requested by the referees and Editors of your manuscript. You should provide two versions of this manuscript and both versions must be provided in an editable format:

one version identifying all the changes that have been made (for instance, in coloured highlight, in bold text, or tracked changes);

a 'clean' version of the new manuscript that incorporates the changes made, but does not highlight them. This version will be used for typesetting.

Please ensure that any equations included in the paper are editable text and not embedded images.

Please ensure that you include an acknowledgements' section before your reference list/bibliography. This should acknowledge anyone who assisted with your work, but does not qualify as an author per the guidelines at <https://royalsociety.org/journals/ethics-policies/openness/>.

While not essential, it will speed up the preparation of your manuscript proof if you format your references/bibliography in Vancouver style (please see <https://royalsociety.org/journals/authors/author-guidelines/#formatting>). You should include DOIs for as many of the references as possible.

If you have been asked to revise the written English in your submission as a condition of publication, you must do so, and you are expected to provide evidence that you have received language editing support. The journal would prefer that you use a professional language editing service and provide a certificate of editing, but a signed letter from a colleague who is a native

speaker of English is acceptable. Note the journal has arranged a number of discounts for authors using professional language editing services (<https://royalsociety.org/journals/authors/benefits/language-editing/>).

===PREPARING YOUR REVISION IN SCHOLARONE===

To revise your manuscript, log into <https://mc.manuscriptcentral.com/rsos> and enter your Author Centre - this may be accessed by clicking on "Author" in the dark toolbar at the top of the page (just below the journal name). You will find your manuscript listed under "Manuscripts with Decisions". Under "Actions", click on "Create a Revision".

Attach your point-by-point response to referees and Editors at Step 1 'View and respond to decision letter'. This document should be uploaded in an editable file type (.doc or .docx are preferred). This is essential.

Please ensure that you include a summary of your paper at Step 2 'Type, Title, & Abstract'. This should be no more than 100 words to explain to a non-scientific audience the key findings of your research. This will be included in a weekly highlights email circulated by the Royal Society press office to national UK, international, and scientific news outlets to promote your work.

At Step 3 'File upload' you should include the following files:

-- Your revised manuscript in editable file format (.doc, .docx, or .tex preferred). You should upload two versions:

- 1) One version identifying all the changes that have been made (for instance, in coloured highlight, in bold text, or tracked changes);
- 2) A 'clean' version of the new manuscript that incorporates the changes made, but does not highlight them.

-- An individual file of each figure (EPS or print-quality PDF preferred [either format should be produced directly from original creation package], or original software format).

-- An editable file of each table (.doc, .docx, .xls, .xlsx, or .csv).

-- An editable file of all figure and table captions.

Note: you may upload the figure, table, and caption files in a single Zip folder.

-- Any electronic supplementary material (ESM).

-- If you are requesting a discretionary waiver for the article processing charge, the waiver form must be included at this step.

-- If you are providing image files for potential cover images, please upload these at this step, and inform the editorial office you have done so. You must hold the copyright to any image provided.

-- A copy of your point-by-point response to referees and Editors. This will expedite the preparation of your proof.

At Step 6 'Details & comments', you should review and respond to the queries on the electronic submission form. In particular, we would ask that you do the following:

-- Ensure that your data access statement meets the requirements at

<https://royalsociety.org/journals/authors/author-guidelines/#data>. You should ensure that you cite the dataset in your reference list. If you have deposited data etc in the Dryad repository, please only include the 'For publication' link at this stage. You should remove the 'For review' link.

-- If you are requesting an article processing charge waiver, you must select the relevant waiver option (if requesting a discretionary waiver, the form should have been uploaded at Step 3 'File upload' above).

-- If you have uploaded ESM files, please ensure you follow the guidance at <https://royalsociety.org/journals/authors/author-guidelines/#supplementary-material> to include a suitable title and informative caption. An example of appropriate titling and captioning

may be found at [https://figshare.com/articles/Table\\_S2\\_from\\_Is\\_there\\_a\\_trade-off\\_between\\_peak\\_performance\\_and\\_performance\\_breadth\\_across\\_temperatures\\_for\\_aerobic\\_sc\\_ope\\_in\\_teleost\\_fishes\\_/3843624](https://figshare.com/articles/Table_S2_from_Is_there_a_trade-off_between_peak_performance_and_performance_breadth_across_temperatures_for_aerobic_sc_ope_in_teleost_fishes_/3843624).

At Step 7 'Review & submit', you must view the PDF proof of the manuscript before you will be able to submit the revision. Note: if any parts of the electronic submission form have not been completed, these will be noted by red message boxes.

## Author's Response to Decision Letter for (RSOS-201669.R0)

See Appendix A.

## Decision letter (RSOS-201669.R1)

We hope you are keeping well at this difficult and unusual time. We continue to value your support of the journal in these challenging circumstances. If Royal Society Open Science can assist you at all, please don't hesitate to let us know at the email address below.

Dear Dr Putelat,

I am pleased to inform you that your manuscript entitled "Local impacts of climate change on winter wheat in Great Britain" is now accepted for publication in Royal Society Open Science.

Please accept our apologies for the delay here: a miscommunication between editorial office and the editors regrettably caused some confusion.

If you have not already done so, please ensure that you send to the editorial office an editable version of your accepted manuscript, and individual files for each figure and table included in your manuscript. You can send these in a zip folder if more convenient. Failure to provide these files may delay the processing of your proof. Y

If you have not already done so, please remember to make any data sets or code libraries 'live' prior to publication, and update any links as needed when you receive a proof to check - for instance, from a private 'for review' URL to a publicly accessible 'for publication' URL. It is good practice to also add data sets, code and other digital materials to your reference list.

You can expect to receive a proof of your article in the near future. Please contact the editorial office ([openscience@royalsociety.org](mailto:openscience@royalsociety.org)) and the production office ([openscience\\_proofs@royalsociety.org](mailto:openscience_proofs@royalsociety.org)) to let us know if you are likely to be away from e-mail contact -- if you are going to be away, please nominate a co-author (if available) to manage the proofing process, and ensure they are copied into your email to the journal. Due to rapid publication and an extremely tight schedule, if comments are not received, your paper may experience a delay in publication.

Please see the Royal Society Publishing guidance on how you may share your accepted author manuscript at <https://royalsociety.org/journals/ethics-policies/media-embargo/>. After publication, some additional ways to effectively promote your article can also be found here

<https://royalsociety.org/blog/2020/07/promoting-your-latest-paper-and-tracking-your-results/>.

On behalf of the Editors of Royal Society Open Science, thank you for your support of the journal and we look forward to your continued contributions to Royal Society Open Science.

Kind regards,  
Royal Society Open Science Editorial Office  
Royal Society Open Science  
[openscience@royalsociety.org](mailto:openscience@royalsociety.org)

on behalf of Dr Yhasmin Mendes de Moura (Associate Editor) and Pete Smith (Subject Editor)  
[openscience@royalsociety.org](mailto:openscience@royalsociety.org)

Follow Royal Society Publishing on Twitter: @RSocPublishing  
Follow Royal Society Publishing on Facebook:  
<https://www.facebook.com/RoyalSocietyPublishing.FanPage/>  
Read Royal Society Publishing's blog:  
<https://royalsociety.org/blog/blogsearchpage/?category=Publishing>



# Appendix A

## Response to Reviewer 2.

Title: Local impacts of climate change on winter wheat in Great Britain

Authors: T. Putelat, A.P. Whitmore, N. Senapati, M.A. Semenov

Journal: RSOS

We thank the reviewer for his or her review, comments and observations. We have revised accordingly.

### ***Response to Ref #1.***

The handling of drought stress in the manuscript is still confusing. The authors should simply adjust terms. They consider a mean season drought stress and a drought stress around anthesis. Just use one abbreviation with two indices and don't confuse the reader by the hopeless attempt to introduce a new terminology.

WSI is a seasonal stress from water limitation for a cultivar tolerant to heat and drought stress around anthesis. This type of stress can be simulated by many crop models. However, not all crop models incorporate responses to heat and drought stress around anthesis, but Sirius does. Therefore, we decided to analyse two additional stress indices, DSI and HSI, which simulate the specific reduction in yield due to decreases in grain number and grain size as a result of drought or heat stress around anthesis. By doing so, we analyse how these stress indices will change under climate change. This type of analysis is critical for understanding severity of impacts of climate change on wheat. We have carefully revised the abstract and the main text to avoid any ambiguity between definition and usage of terms for the various stresses. Please, note, that the original R1 was satisfied with the revised manuscript.

### ***Response to Ref #2.***

The authors still suggest in their modified title they would address the future winter wheat cropping in Great Britain. The authors downplay the meaning of the title for the reviewer but not for the reader. The reader still expects a comprehensive regional study.

The title has been changed to "Local impacts of climate change on winter wheat in Great Britain".

The focus of the paper is unclear: 'This paper will primarily focus on estimating the level of this climate uncertainty and weather variability on crop yield in the future'. What is meant with, "estimating the level of this climate uncertainty"? I cannot find the answer in the abstract of the paper or elsewhere.

The focus of the paper is an investigation of the impacts of climate change on winter wheat in Great Britain (as in the title). To clarify the treatment of uncertainty, we revised the paragraph (page 2, lines 25-31) as:

“In this paper, we consider “climate uncertainty” in yield predictions, which results from the uncertainty associated with climate projections from Global Climate Models (GCMs) in the CMIP5 ensemble. Besides GCM climate uncertainty, we also assess the impact of “interannual weather variability” on yield prediction, which accounts for the interannual stochastic variability of the weather at each location. Because crop growth and development, and hence crop yields, respond nonlinearly to local weather conditions, it is important to quantify the contributions of “climate uncertainty” and “interannual weather variability” to uncertainty in yield prediction in the future, i.e. 2050.”

We have also carefully revised the abstract.

The study has value only for the test sites where real soil conditions were used as basis. At all other location the reader is still left with the question, how will the outcome be sustained when the actual soil instead of the generalised one is taken into account? For a source of variability study with a representative simulation of the soil x climate interactions for Great Britain the authors might use the following analysis as an orientation (reviewer not among the authors): Hattermann, F. F., Vetter, T., Breuer, L., Su, B., Daggupati, P., Donnelly, C., Fekete, B., Flörke, F., Gosling, S. N., Hoffmann, P., Liersch, S., Masaki, Y., Motovilov, Y., Müller, C., Samaniego, L., Stacke, T., Wada, Y., Yang, T., Krysanova, V. (2018): Sources of uncertainty in hydrological climate impact assessment: a cross-scale study. - Environmental Research Letters, 13, 1, 015006. <https://doi.org/10.1088/1748-9326/aa9938>

We have already addressed the question of using variable soils by adding simulations for a “poor” soil with AWC =127 mm, which we reported in SI. This was our response to the original R2:

“However, to tackle this issue of soil variability, we have performed further simulation with a different soil with a low available water content (AWC=127 mm). The results are presented in the S.I. Fig. 5 and briefly analysed in the SI document. We find that the reduction of the soil water capacity does not change the trends that we have described in the original text of our paper. However, as one can expect, the reduction of AWC is accompanied by a reduction of yield (that can reach 1 t/ha) and an increase in interannual variability (that can reach 15% instead of the 10% we find for the original soil which is less sensitive to water limitation). We also refer to a companion paper (Harkness et al., 2020) where soil variability is studied in more detail.”

We believe that investigation of impacts of climate change on wheat in Great Britain is clearly presented in the revised manuscript. In our study, we focused on analysis of “climate uncertainty” and “interannual weather variability” using a single crop model with 19 CMs and 2 RCPs. We believe that the manuscript will have little benefit from the additional analysis of soil x climate interactions (similar to Hattermann et al 2018 as suggested by R2). Moreover, the key element of the Hattermann et al 2018 paper was the comparison/uncertainty between 13 hydrological models with 5 GCMs and 3 RCPs, which is not the case in our study.

### **Response to Ref #3.**

Ref 3 has the same concern as Ref 2 in respect to the representative value of the study. I share these concerns and think the authors current reply is not sufficient in this respect. Instead of keeping the soil profiles constant I would recommend to vary them as suggested by Ref 3 and apply an analysis of variance similar to the one above.

By selecting a single soil profile for all locations (AWC=177 mm or AWC=127 mm) we focused on investigation of the impact of climate change on wheat. This is a standard approach which allows to exclude the effect of soil variation, and to concentrate on studying the effects of changed climate. This was our response to the original R3:

“The revised version of our paper is now more comprehensive and includes in the SI document new simulations results for 1) an additional soil type with a low AWC, 2) an additional cultivar, 3) additional sowing dates and 4) simulations without the CO<sub>2</sub> fertilization effect. The new results confirm our initial conclusions”.

Reply to the Ref 3 Page 3 line 79 comment. The authors need to explain better their motivation for combining the GCM ensemble outcome with one weather generator. It would be interesting to see the different effects of an impact study that a) leaves the GCM stochastic more or less untreated and corrects for the mean bias only and b) that combines the GCM outcome with a weather generator.

GCMs from the CMIP5 ensemble do not reproduce well interannual weather variability due to their coarse spatial and temporal resolution. Therefore, the use of the raw (bias-corrected) outputs from GCMs with process-based crop models, which respond to weather variability in non-linear way, is not recommended. We use a single WG as a mean of downscaling climate projections from GCMs to a local scale. As we explained in our response to the original R3, the use of many WGs should make little difference to conclusions of our study. This was our original response to the original R3:

“WG is not a bottleneck, because WG does not predict future climates. All WGs are designed to reproduce baseline climate accurately. Therefore, the use of two weather generators WG1 and WG2 with a single GCM should produce very similar climate scenarios for the future. But two GCMs, GCM1 and GCM2, will produce very different climate projections and after downscaling very different climate scenarios. That is why in our study we estimated uncertainty due to different GCMs from CMIP5.”

#### REVISED ABSTRACT.

*Under future CMIP5 climate change scenarios for 2050 an increase in wheat yield of about 10% is predicted in Great Britain as a result of the combined effect of CO<sub>2</sub> fertilization and a shift in phenology. Compared to the present day, crops escape increases in the climate impacts of drought and heat stresses on grain yield by developing before these stresses can occur. In the future, yield losses from water stress over growing season will remain about the same across Great Britain with losses reaching around 20% of potential yield, whilst losses from drought around flowering will decrease and account for about 9% of water limited yield. Yield losses from heat stress around flowering will remain negligible in the future. These conclusions are drawn from a modelling study based on the response of the Sirius wheat simulation model to local-scale 2050-climate scenarios derived from 19 Global Climate Models from the CMIP5 ensemble at 25 locations representing wheat growing areas in Great Britain. However, depending on susceptibility to water stress, substantial interannual yield variation between locations is predicted, in some cases suggesting low wheat yield stability. For this reason, local-scale studies should be performed to evaluate uncertainties in yield prediction related to future weather patterns.*
